# Supplementary material
Source: MDPI journal article supplement (https://www.mdpi.com/2071-1050/11/3/627)
Supplement: s1 [file s1]

## Bijlage | Vragenlijst interviews

|    | onderwerp           | vraag                                                                                                                                                                              |
|----|---------------------|------------------------------------------------------------------------------------------------------------------------------------------------------------------------------------|
| 1  | Interviewpartner    | Wat is je eigen rol of functie?                                                                                                                                                    |
| 2  |                     | Over wat voor type project hebben we het? (campus)                                                                                                                                 |
| 3  |                     | Met welk type projecten of opdrachtgevers ben je bezig? (extern)                                                                                                                   |
| 4  | Circulariteit       | Wat betekent circulariteit voor jou, wat zijn de associatie en het idee bij het begrip? (eigen kennis/scope/doel)                                                                  |
| 5  |                     | Heb je in het kader van eigen werk met vraagstellingen hierover te maken gehad? In welk verband?                                                                                   |
| 6  |                     | Is circulariteit een actueel onderwerp in de organisatie?<br>Waarbij ligt dan de focus?                                                                                            |
| 7  |                     | Pas je op een andere manier duurzaamheid toe in projecten, heb je ervaring daarmee?                                                                                                |
| 8  |                     | Hoe zie je de verhouding tussen de begrippen circulariteit en duurzaamheid?                                                                                                        |
| 9  |                     | Wat is de ambitie van het bedrijf op het gebied van duurzaamheid en circulariteit? (extern)<br>Zijn er concrete projecten? Hoever zijn opdrachtgevers?                             |
| 11 |                     | In hoeverre speelt duurzaamheid of circulariteit een rol op de campus (visie) of in het project?                                                                                   |
| 10 |                     | Waar komt de vraag naar circulariteit vandaan – eigen initiatief/management/opdrachtgever?                                                                                         |
| 11 |                     | Waar zit de grootste uitdaging met de blik op circulaire projecten? Wat zijn de issues?<br>(ketenintegratie/systeemintegratie/betalen voor gebruik/eigendom materiaal van derden?) |
| 12 |                     | Wat is het lastigst, wat zijn de belemmeringen bij het toepassen van circulaire principes?                                                                                         |
| 13 |                     | In hoeverre worden circulaire principes toegepast (in het kader van eigen werk/campus/projecten)?                                                                                  |
| 14 |                     | Heb je al voortgang geboekt met het onderwerp circulariteit, waar zie je de kansen? Wat helpt verder om de doelstellingen te bereiken?                                             |
| 15 |                     | Heeft het wel/geen succes – waarom/niet?                                                                                                                                           |
| 16 |                     | Waar loop je tegen aan – wat zou anders moeten om het beter te doen?                                                                                                               |
| 17 |                     | Waarom worden circulaire principes nog niet toegepast (in het kader van eigen werk/campus/projecten)?                                                                              |
| 18 | Campus-ontwikkeling | Zie jij een verband tussen circulariteit en campusontwikkeling? Op welk niveau?                                                                                                    |
| 19 | Visie/ ambitie      | Speelt het onderwerp duurzaamheid/circulariteit een rol in de campusvisie?                                                                                                         |
| 20 | Strategie           | Hoe wordt dat vertaald naar een strategie binnen projecten?                                                                                                                        |
| 21 | Beleid              | Welk beleid bestaat er ten opzichte van duurzaamheid/circulariteit?                                                                                                                |
| 22 | Proces              | Hoe wordt duurzaamheid of circulariteit integraal meegenomen in de huidige of toekomstige fase?<br>- ontwikkeling/realisatie (productie)/gebruik/beheer/verwijderingsproces/sloop  |
| 23 | Besluitvorming      | Wie is maatgevend in de besluitvorming over circulariteit/project?                                                                                                                 |

|    |                         |                                                                                                                                                                                                                                                                                                                                                                                       |
|----|-------------------------|---------------------------------------------------------------------------------------------------------------------------------------------------------------------------------------------------------------------------------------------------------------------------------------------------------------------------------------------------------------------------------------|
| 24 | Eigenaarschap           | Wie is eigenaar van:<br>grond/kavel/gebouw/constructie/installatie/inbouw/meubilair                                                                                                                                                                                                                                                                                                   |
| 25 |                         | Zijn leaseconstructies denkbaar?                                                                                                                                                                                                                                                                                                                                                      |
| 26 | Beheer                  | Is hergebruik van materiaal mogelijk bij reparatie/vervanging/herstel?                                                                                                                                                                                                                                                                                                                |
| 27 | Vraagspecificatie       | Welke methodiek wordt toegepast bij de vraagspecificatie (bestek, functioneel specificeren)?                                                                                                                                                                                                                                                                                          |
| 28 |                         | Wanneer in het proces en door wie worden eisen gespecificeerd?                                                                                                                                                                                                                                                                                                                        |
| 29 |                         | Is het programma van eisen maatgevend of het ontwerp?                                                                                                                                                                                                                                                                                                                                 |
| 30 | Duurzaamheids-aspecten: | Welke/hoe/door wie worden daarbij duurzaamheidseisen of circulariteit gedefinieerd?                                                                                                                                                                                                                                                                                                   |
| 31 |                         | Welke onderwerpen spelen daarbij een rol:<br>- klimaatbestendigheid/energiezuinig – hernieuwbare energie<br>- beperken materiaal verbruik – beperken afval – gebruik secundair materiaal – reductie van de ‘vraag’<br>- ontwerp voor demontage en hergebruik<br>- LCA en milieubelasting (toxische stoffen) – producteisen met blik op schaarste<br>- sociale en economische aspecten |
| 32 | Ruimtegebruik/ functies | Wat bepaalt de kwantiteit (efficiency, oppervlak/gebruiker)?<br>Wat bepaalt de kwaliteit (multifunctioneel/monofunctioneel/flexibel)?                                                                                                                                                                                                                                                 |
| 33 | Gebruiksduur            | Hoe/door wie wordt bepaald of sprake is van tijdelijk gebruik/langdurig gebruik/permanent gebruik?                                                                                                                                                                                                                                                                                    |
| 34 | Ontwerpcriteria         | Door wie of wat worden criteria voor het ontwerp bepaald?<br>(Esthetisch, duurzaam, efficiënt, budgettair – hergebruik/ nieuwbouw)<br>Wie maakt de keuze? Wie neemt het besluit?                                                                                                                                                                                                      |
| 35 | Materiaal/ producten    | Door wie of wat worden criteria voor materiaal en producten bepaald?<br>Wie maakt de keuze? Wie neemt het besluit?                                                                                                                                                                                                                                                                    |
| 36 | Ontwerpproces           | Hoe worden de betrokken architect, constructeur, installatieadviseur geselecteerd, op basis van welke criteria vindt de selectie plaats?                                                                                                                                                                                                                                              |
| 37 | Duurzaamheid            | Worden specifieke duurzaamheidseisen of circulariteitseisen mee gegeven aan de ontwerpers? Welke?                                                                                                                                                                                                                                                                                     |
| 38 |                         | Worden eisen gesteld aan het constructieprincipe (casco/inbouw/modulair/demontabel)?                                                                                                                                                                                                                                                                                                  |
| 39 | Systeemintegratie       | Hoe wordt rekening gehouden met duurzaamheidseisen ten opzichte van de verschillende schaalniveaus?                                                                                                                                                                                                                                                                                   |
| 40 |                         | Worden specifieke systeemeisen geformuleerd zoals:<br>(hergebruik, energie-efficiëntie, modulair/adaptief/demontabel/andere?)                                                                                                                                                                                                                                                         |
| 41 |                         | Hoe vlieg je het aan? Hoe doe je het: toepassen van een stromenanalyse van grondstoffen? Wat is belangrijk? Ruimtelijk verband en systeemdenken? Hergebruik? Synergie? Organisatie en proces?                                                                                                                                                                                         |
| 42 | Stromen                 | Welke stromen zijn relevant met het oog op circulariteit? Hoe worden deze verduurzaamd? Wordt een nulmeting gedaan om synergie-effecten te zoeken?                                                                                                                                                                                                                                    |
| 43 |                         | Wordt per schaal ernaar gekeken?<br>product/componenten/constructie/gebouw/kavel/campusgebied                                                                                                                                                                                                                                                                                         |
| 44 |                         | Welke onderwerpen en criteria spelen een rol:<br>- niet toxisch<br>- grondstoffen<br>- sparen<br>- hergebruik/hernieuwbaar<br>- energie/CO <sub>2</sub>                                                                                                                                                                                                                               |

|    |                           |                                                                                                                                                                                            |
|----|---------------------------|--------------------------------------------------------------------------------------------------------------------------------------------------------------------------------------------|
|    |                           | <ul style="list-style-type: none"> <li>- klimaatadaptief</li> <li>- diversiteit</li> <li>- sociaal evenwicht</li> </ul>                                                                    |
| 45 | Eisen bouwproces          | Worden eisen gesteld ten opzichte van het bouwproces? Zo ja, welke? pre-fab, modulair, materiaal (producteisen duurzaamheid)                                                               |
| 46 | Eisen sloop               | Worden eisen gesteld ten opzichte van het (toekomstige) verwijderingsproces? Zo ja, welke?                                                                                                 |
| 47 | LCA eisen                 | Worden eisen gesteld met het oog op de levenscyclusanalyse (LCA)?                                                                                                                          |
| 48 | Informatie                | Wordt gebruikgemaakt van Bouw Informatie Management (BIM), 3D, platforms voor informatiebeheer, links met andere projecten, materialenbanken enzovoort?                                    |
| 49 | Borging eisen             | Hoe worden duurzaamheids- en circulariteitseisen geborgd? (verificatie, validatie, kwaliteitscontrole, KPI's)                                                                              |
| 50 | Actoren                   | Welke actoren zijn relevant? Welke hebben de meeste invloed in het proces? (gebruikers, interne afdelingen, externe partijen zoals architect, adviseur)                                    |
| 51 | Gebruiker                 | Wordt gebruiksgedrag/worden eisen actief gestuurd – Zo ja, hoe?                                                                                                                            |
| 52 | Samenwerking              | Welke samenwerkings- en contractvormen worden gehanteerd met <ul style="list-style-type: none"> <li>- architecten en adviseurs</li> <li>- aannemers</li> </ul> bouwteam/D&B/DBM et cetera? |
| 53 | Uitvoering                | Hoe verlopen selectie/inkoop/aanbesteding – hoe wordt het in de markt gezet?                                                                                                               |
| 54 | Ketenintegratie?          | Worden de deskundigheid en innovatiekracht van de uitvoerende partijen betrokken? Zo ja, hoe?                                                                                              |
| 55 | Aanbesteding / contracten | Innovatie aanbesteding/contractvormen – wat kan wel/wat kan niet voor een universitaire organisatie (of andere opdrachtgevers) in het kader van de regelgeving?                            |
| 56 |                           | Gaat Procurement hierin mee?                                                                                                                                                               |
| 57 |                           | Er zijn recente onderzoeken gepubliceerd over circulair contracteren en circulair aanbesteden. Is dit onderwerp bekend?                                                                    |
| 58 |                           | Hoe wordt gekeken naar andere vormen van aanbesteden (prestatiegericht, functioneel specificeren) en integrale contractvormen (D&B, DBM, lease)?                                           |
| 59 |                           | Zijn leaseconstructies denkbaar?<br>Zo ja, hoe wordt het ingevuld? Zo niet, wat is er zo lastig aan?                                                                                       |
| 60 |                           | Zijn Europese aanbestedingen een belemmering als we circulair willen bouwen? Of kan dit binnen het kader van deze aanbestedingsreglementen?                                                |
| 61 | Onderzoek                 | In hoeverre zijn recente onderzoeken bekend, bijvoorbeeld circulair aanbesteden of circulair contracteren?                                                                                 |
| 62 | Eigen onderzoek           | Naar aanleiding van korte presentatie: Werkt dit model? Helpt dit verder voor een systematiek?                                                                                             |
